# Supplementary material for: Epidemiology of childhood blindness: A community-based study in Bangladesh
Source: PubMed Central journal article supplement (PMC6555501; doi:10.1371/journal.pone.0211991), 2019-06-07

# চোখের আঘাত

## Ocular Trauma

### অভিভাবককে প্রশ্ন করুন

- আপনার সন্তানের চোখে কোন আঘাত লেগেছিল কি না?

### Question to Guardians:

- Where your child's eyes injured?

### টর্চ দিয়ে পরীক্ষা করুন

- চোখে আঘাতের কোন চিহ্ন আছে কি না?

### Examine with a torch

- is there any evidence of any injury?

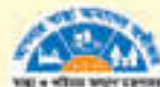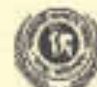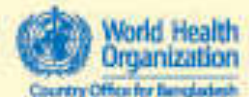

# চোখের ঘা (আলসার)

Corneal Ulcer

## অভিভাবককে প্রশ্ন করুন

- আপনার সন্তানের চোখে কোন আঘাত লেগেছিল কি না?
- আলোতে তাকাতে অসুবিধা হয় কি না?

## Question to Guardians:

- Where your child's eyes injured?
- Have trouble looking at light?

## টর্চ দিয়ে পরীক্ষা করুন

- চোখের মণিতে সাদা দাগ দেখা যায় কি না?

## Examine with a torch

- Have white spots in the pupil of the eyes?

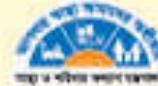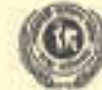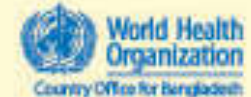

# রেটিনোপ্যাথি অব প্রিম্যাচিউরিটি (ROP)

## অভিভাবককে প্রশ্ন করুন

- আপনার বাচ্চা ৩৫ সপ্তাহ বা তার আগে  
জন্মগ্রহণ করেছে কি না?
- জন্মের সময় বাচ্চার ওজন ২ কিলোগ্রাম  
বা তার কম ছিল কি না?

### Question to Guardians:

- Was your child born on 35 weeks or before?
- At the time of birth was the child's weight 2 kilogram or less?

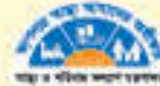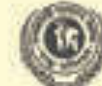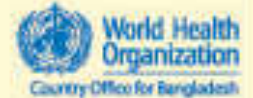

# মস্তিষ্কের সমস্যাজনিত অন্ধত্ব

Cortical Visual Impairment (child with poor or no visual response)

অভিভাবককে প্রশ্ন করুন

- আপনার সন্তান স্বাভাবিকভাবে আপনার দিকে তাকায় কি না?

**Question to Guardians:**

- Does your child look at you normally?

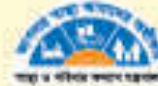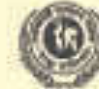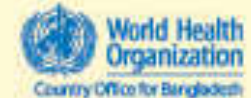

# চোখের ছানি

## Cataract

### অভিভাবককে প্রশ্ন করুন

- আপনার সন্তানের চোখে দেখতে অসুবিধা হয় কি না?
- আপনার সন্তানের চোখের মণি সাদা বা ধূসর কি না?

### Question to Guardians:

- Does your child have problem seeing?
- Is your child's pupil white or grey?

### টর্চ দিয়ে পরীক্ষা করুন

- শিশুটির চোখের মণি সাদা বা ধূসর কি না?

### Examine with a torch

Whether there are any white spot/ spot in the pupils of the child's eyes

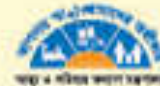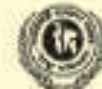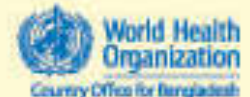

# রেটিনোব্লাস্টোমা (এটি একটি চোখের ক্যান্সার)

## Retinoblastoma

### অভিভাবককে প্রশ্ন করুন

- শিশুটির চোখের মণি সাদা দেখা যায় কি না যা সাধারণত রাতে আলোতে বিড়ালের চোখের মত জ্বলজ্বল করে।

### Question the Guardians:

- Does the child's pupil look white and do they generally glow at night like a cat.

### টর্চ দিয়ে পরীক্ষা করুন

- সাদা চোখ আলোতে জ্বলজ্বল করে কি না?

### Examine with a torch

- Does the white eye glow in light?

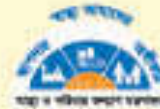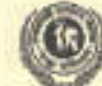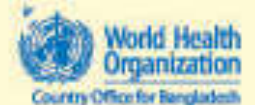

# ঢ়়়়় ঢ়়

## Squint

### অভিভাবককে প্রশ্ন করুন

- আপনার সন্তানের ঢ়়়় ঝাঁকা কি না অথবা মাঝে মাঝে ঝাঁকা হয়ে যায় কি না?

### Question to Guardians:

- Does your child have curved eyes or do they sometimes gets curved?

### নিজে পর্যবেক্ষণ করুন

- ঢ়়়় কোনদিকে ঝাঁকা অথবা ঢ়়়়়় হয়ে আছে কি না?

### Observe yourself

- Which way is the eye curved or is it squint?

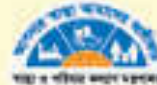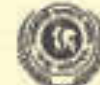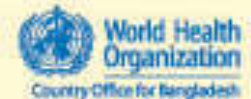

# চোখের গঠনগত ত্রুটি

## Congenital Anomaly of Eyes

### অভিভাবককে প্রশ্ন করুন

- আপনার সন্তানের চোখে গঠনগত অস্বাভাবিকতা আছে কি না?

### Question to Guardians:

- Is there any structural abnormality in your child's eyes?

### নিজে পর্যবেক্ষণ করুন, শিশুটির

- চোখের পাতা নিচে নেমে এসেছে কি না?
- সামনের দিকে চোখ বের হয়ে আছে কি না?
- চোখের মণি অস্বাভাবিক বড় কি না?
- চোখ অস্বাভাবিক ছোট কি না?

### Observe yourself, is the child's

- Eyelids coming down?
- Eyes are coming out towards the front?
- Cornea enlarged?
- Eyes abnormally small?

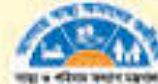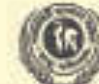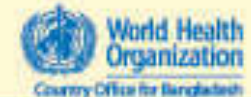

Supplement: pone.0211991.s003.pdf [file pone.0211991.s003.pdf]
